# Supplementary material for: Anion control of ligand self-recognition in a triple helical arrayElectronic supplementary information (ESI) available: synthesis and characterisation of ligands and complexes. All new compounds were characterised by CHN, 1H NMR and ESI-MS. 1H NMR of the mixing experiment. See http://www.rsc.org/suppdata/cc/b3/b313218h/
Source: Royal Society of Chemistry journal article supplement (doi:10.1039/b313218h), 2004-01-01
Supplement: b313218h.doc [file b313218h.doc]

**Experimental section**

L1: The ligand was synthesised in four steps from 6-cyanonicotinic acid. 1H NMR (400 MHz, [d6]DMSO:  = 9.09 (d, *J* = 1.9 Hz, 1H; py), 9.01 (d, *J* = 7.7 Hz, 1H; py), 8.46 (dd, *J* = 8.3 and 2.1 Hz, 1H; py), 8.37 (s, 1H; thia), 8.36 (d, *J* = 7.5 Hz, 1H; N*H*), 4.36 (pseudo t, *J* = 7.5 Hz, 1H; NC*H*), 3.69 (s, 3H; CO2C*H*3), 2.22 (m, 1H; C*H*CH3), 1.02 (d, *J* = 6.74 Hz, 3H; CHC*H*3), 0.97 (d, *J* = 6.75 Hz, 3H; CHC*H*3). ESI-MS: *m/z* = 637 calcd; 637 found. C30H32N6O6S2·H2O (654.7) calcd. C 55.0, H 5.2, N 12.8; found C 55.0, H 5.0, N 12.7.

[Co2(L1)3].(ClO4)4: The complex was synthesized by reaction of L1 with [Co(ClO4)2]·6H2O in acetonitrile in a 3:2 ratio, from which solution a good yield of orange crystalline product could be isolated by diffusion of MeCO2Et. ESI-MS: *m/z* = 1113 [Co2(L1)3(ClO4)2]2+ C90H96N18O18S6Co2Cl4O16·2H2O (2461.9) calcd. C 43.9, H 4.1, N 10.2; found C 43.5, H 3.9, N 9.7 %.

[Co2(L1)3].(NO3)2(ClO4)2: The complex was synthesized by reaction of L1 with [Co(ClO4)2]·6H2O and But4NO3 in acetonitrile in a 3:2:2 ratio, from which solution a good yield of orange crystalline product could be isolated by diffusion of MeCO2Et. ESI-MS: *m/z* = 1076 [Co2(L1)3(NO3)2]2+ C90H96N18O18S6Co2Cl2O8N2O6·2H2O (2387.1) calcd. C 45.3, H 4.2, N 11.7; found C 45.8, H 3.9, N 11.3 %.

Aromatic region of the 1H NMR spectrum (CD3CN) of [Co2(L1)3]4+ (**a**), [Co2(L3)3]4+ (**b**), [Co2(L1)3]4+, [Co2(L1)2(L3)]4+, [Co2(L1)(L3)2]4+ and [Co2(L3)3]4+ (**c**) and [Co2(L1)3]4+and [Co2(L3)3]4+ (**d**).
